# Supplementary material
Source: publisher site journal article supplement (https://www.dovepress.com/article/483098)
Supplement: Supplementary file 1 [file get_supplementary_file.php]

**Supplementary Tables**

**Table S1. Variant strains information of 2091 COVID-19 patients.**

| **Variant strains** | **Number of patients** |
| --- | --- |
| AY.122 | 1 |
| B.1.1.231 | 1 |
| BA.2.12.1 | 1 |
| BA.2.3.7 | 1 |
| BA.5.1 | 1 |
| BA.5.2.7 | 1 |
| BF.7.14 | 1 |
| XBB.1.5 | 1 |
| BA.5.2.1 | 2 |
| BQ.1 | 2 |
| BQ.1.2 | 2 |
| BA.5.2.48 | 3 |
| C.35 | 3 |
| XBB.1.16 | 3 |
| AY.126 | 4 |
| BA.2.3 | 5 |
| BF.7 | 13 |
| BA.5.2 | 16 |
| BA.1 | 29 |
| BA.1.1 | 39 |
| B.1.1.7 | 85 |
| AY.30 | 124 |
| BA.2 | 227 |
| B.1.480 | 445 |
| BA.2.2 | 1081 |

**Table S2. Laboratory indexes in patients infected with SARS-CoV-2 variants on admission.**

| **L****aboratory indexes** | **Unit** | **Total N = 1413** | **Wild-type N = 322** | **Alpha N = 67** | **Delta N = 98** | **Omicron N = 926** | ***P*** | ***P*1** | ***P*2** | ***P*3** | ***P*4** | ***P*5** | ***P*6** |
| --- | --- | --- | --- | --- | --- | --- | --- | --- | --- | --- | --- | --- | --- |
| ***Blood routine index*** | | | | | | | | | | | | | |
| RBC | ×1012/L | 4.77 (4.44-5.15) | 4.42 (3.47-4.72) | 4.88 (4.57-5.19) | 5.12 (4.78-5.34) | 4.76 (4.43-5.13) | <0.001 | 0.100 | 1.000 | 0.400 | <0.001 | <0.001 | 1.000 |
| WBC | ×109/L | 5.43 (4.30-6.91) | 3.78 (1.72-4.83) | 5.56 (4.48-7.20) | 6.43 (4.84-7.82) | 5.55 (4.42-7.03) | <0.001 | 0.262 | 1.000 | 0.003 | 0.003 | <0.001 | <0.001 |
| LYM | ×109/L | 1.33 (0.99-1.77) | 1.17 (0.44-1.51) | 1.66 (1.04-2.11) | 1.29 (1.02-1.63) | 1.24 (0.91-1.67) | <0.001 | 0.043 | 0.001 | 1.000 | 1.000 | 0.003 | <0.001 |
| NEU | ×109/L | 3.40 (2.44-4.73) | 2.74 (1.98-3.81) | 3.33 (2.50-4.51) | 4.38 (3.31-5.87) | 3.63 (2.56-4.99) | <0.001 | <0.001 | 1.000 | 0.004 | <0.001 | <0.001 | <0.001 |
| PLT | ×109/L | 208 (174-249) | 160 (79-196) | 219 (189-260) | 236 (202-277) | 209 (175-248) | <0.001 | 0.750 | 0.670 | 0.020 | <0.001 | <0.001 | 0.010 |
| HGB | g/L | 142 (130-154) | 131 (82-143) | 141 (131-154) | 155 (138-160) | 140 (130-153) | <0.001 | 0.007 | 1.000 | 1.000 | <0.001 | <0.001 | 1.000 |
| ***Infection indicators*** | | | | | | | | | | | | | |
| SAA | mg/L | 21.1 (8.1-72.4) | 4.8 (0.1-19.8) | 12.1 (6.5-33.0) | 12.1 (4.4-29.7) | 24.6 (9.5-82.8) | <0.001 | 1.000 | 0.003 | 1.000 | <0.001 | 0.237 | 0.015 |
| CRP | mg/L | 4.2 (1.5-11.4) | 1.1 (0.1-3.1) | 3.1 (1.0-7.6) | 4.1 (1.8-10.1) | 4.9 (1.7-11.4) | 0.029 | 1.000 | 0.100 | 1.000 | 1.000 | 1.000 | 0.200 |
| ***Liver function index*** | | | | | | | | | | | | | |
| AST | U/L | 20.2 (16.5-26.0) | 17.3 (10.7-20.6) | 23.3 (17.1-31.5) | 20.6 (17.0-25.9) | 19.9 (16.1-25.0) | 0.003 | 0.520 | 0.040 | 1.000 | 1.000 | 1.000 | 0.020 |
| ALT | U/L | 18.1 (13.3-28.5) | 14.5 (6.8-19.6) | 18.1 (11.4-29.6) | 20.4 (15.6-33.5) | 17.0 (12.9-26.7) | <0.001 | 0.338 | 1.000 | 1.000 | 0.001 | 0.859 | 0.003 |
| DBIL | μmol/L | 3.20 (2.30-4.30) | 2.40 (0.80-3.50) | 2.40 (1.78-3.60) | 3.10 (2.20-4.18) | 3.20 (2.30-4.30) | <0.001 | 0.052 | 0.004 | <0.001 | 1.000 | 0.546 | 0.146 |
| ALB | g/L | 44.9 (42.3-47.4) | 40.9 (32.4-43.2) | 46.5 (43.6-47.8) | 47.3 (45.1-49.6) | 45.3 (42.6-47.5) | <0.001 | 0.020 | 1.000 | <0.001 | <0.001 | <0.001 | <0.001 |
| ***Myocardial enzymes*** | | | | | | | | | | | | | |
| CKMB | U/L | 16.7 (13.5-20.4) | 13.5 (3.1-16.0) | 11.5 (9.0-15.1) | 2.0 (0.3-12.4) | 17.8 (14.9-21.2) | <0.001 | <0.001 | <0.001 | <0.001 | <0.001 | <0.001 | <0.001 |
| CK | U/L | 82 (59-119) | 56 (21-74) | 83 (56-118) | 96 (70-128) | 83 (60-120) | 0.004 | 0.612 | 1.000 | 1.000 | 0.221 | 0.004 | 0.051 |
| ***Renal function index*** | | | | | | | | | | | | | |
| BUN | mmol/L | 4.33 (3.56-5.27) | 3.56 (2.07-4.38) | 4.57 (3.72-5.15) | 4.14 (3.30-4.68) | 4.33 (3.57-5.42) | 0.044 | 0.190 | 1.000 | 1.000 | 0.030 | 0.130 | 1.000 |
| Cr | μmol/L | 63.6 (53.2-75.5) | 55.1 (25.1-65.7) | 66.0 (52.6-80.7) | 68.1 (58.8-76.5) | 61.6 (52.1-74.9) | <0.001 | 1.000 | 1.000 | 1.0000 | 0.001 | 0.940 | 0.018 |
| ***Biochemical indicators*** | | | | | | | | | | | | | |
| K+ | mmol/L | 3.54 (3.27-3.83) | 3.17 (2.35-3.39) | 3.79 (3.54-4.14) | 3.82 (3.60-4.02) | 3.54 (3.28-3.83) | <0.001 | 1.000 | <0.001 | <0.001 | <0.001 | <0.001 | <0.001 |
| Glu | mmol/L | 5.33 (4.75-6.37) | 4.67 (2.91-5.14) | 5.53 (5.00-6.14) | 5.99 (5.49-7.23) | 5.32 (4.71-6.34) | <0.001 | 0.020 | 0.790 | 0.050 | <0.001 | <0.001 | 0.040 |
| ***Coagulation function index*** | | | | | | | | | | | | | |
| DD | mg/L | 0.34 (0.22-0.52) | 0.13 (0.01-0.24) | 0.25 (0.18-0.43) | 0.30 (0.22-0.48) | 0.37 (0.25-0.58) | <0.001 | 0.454 | <0.001 | 1.000 | 0.027 | 0.003 | <0.001 |
| APTT | s | 31.9 (29.9-34.0) | 29.1 (22.7-31.1) | 32.1 (30.6-34.5) | 31.5 (29.6-33.5) | 32.1 (30.0-34.3) | <0.001 | 0.730 | 1.000 | 0.030 | 0.450 | 1.000 | <0.001 |
| PT | s | 11.6 (11.0-12.3) | 11.1 (9.8-11.6) | 12.3 (11.5-12.7) | 11.6 (11.2-12.5) | 11.5 (11.0-12.3) | <0.001 | 0.100 | <0.001 | <0.001 | 0.900 | 1.000 | 1.000 |
| TT | s | 14.1 (13.4-15.0) | 13.8 (10.7-14.6) | 15.3 (14.2-16.3) | 13.9 (13.3-15.1) | 14.0 (13.3-14.7) | <0.001 | <0.001 | <0.001 | 0.059 | 1.000 | 0.001 | <0.001 |

RBC, red blood cell count; WBC, white blood cell count; LYM, lymphocyte count; NEU, neutrophil count; PLT, platelet count; HGB, haemoglobin; SAA, serum amyloid A protein; CRP, C-reactive protein; AST, aspartic transaminase; ALT, alanine aminotransferase; DBIL, direct bilirubin; ALB, albumin; CKMB, creatinine kinase-myocardial band; CK, creatine kinase; BUN, blood urea nitrogen; Cr, creatinine; K+, potassium; Glu, glucose; DD, D-Dimer; APTT, activated partial thromboplastin time; PT, prothrombin time; TT, thrombin time.

Data was displayed as median with interquartile range, and Statistical testing by Kruskal-Wallis test and post-hoc testing with Bonferroni method.

*P*, *P* value of Kruskal-Wallis test; *P*1~*P*6, *P* values of post-hoc testing. *P*1, Alpha vs. Delta; *P*2, Alpha vs. Omicron; *P*3, Alpha vs. Wild-type; *P*4, Delta vs. Omicron; *P*5, Delta vs. Wild-type; *P*6, Omicron vs. Wild-type.

**Table S3. Results of multivariate generalized estimating equation analysis of vaccine dose and laboratory indicators in Omicron patients after excluded** **asymptomatic patients before admission.**

| **Dependent variables** | ***β* (95%CI)** | | | | | |
| --- | --- | --- | --- | --- | --- | --- |
| **2 doses (0~1 dose as reference)** | **3~ doses (0~1 dose as reference)** | **Days from admission** | **Female**  **(male as reference)** | **Age** | **Number of comorbidities** |
| ***Blood routine index*** | | | | | | |
| RBC | 0.031 (-0.069, 0.130) | 0.149 (0.064, 0.234) *** | 0.013 (0.003, 0.024) ** | -0.508 (-0.566, -0.450) *** | -0.007 (-0.009, -0.005) *** | 0.017 (-0.027, 0.060) |
| WBC | 0.163 (-0.215, 0.542) | 0.285 (-0.017, 0.588) | 0.046 (-0.002, 0.094) | -0.475 (-0.712, -0.238) *** | -0.008 (-0.015, 0.0002) * | 0.062 (-0.107, 0.231) |
| LYM | -0.101 (-0.293, 0.090) | -0.022 (-0.159, 0.115) | 0.149 (0.134, 0.163) *** | -0.059 (-0.143, 0.025) | -0.010 (-0.014, -0.007) *** | 0.043 (-0.013, 0.099) |
| NEU | 0.312 (-0.038, 0.662) | 0.339 (0.063, 0.616) * | -0.108 (-0.157, -0.059) *** | -0.287 (-0.503, -0.071) ** | 0.004 (-0.003, 0.011) | 0.013 (-0.135, 0.161) |
| PLT | 7.031 (-5.230, 19.292) | 15.230 (4.710, 25.751) ** | 4.165 (2.942, 5.387) *** | 16.736 (8.884, 24.588) *** | -0.700 (-0.953, -0.448) *** | -3.690 (-8.950, 1.570) |
| HGB | 0.870 (-2.321, 4.060) | 4.473 (1.718, 7.229) ** | 0.018 (-0.266, 0.303) | -18.946 (-20.768, -17.124) *** | -0.072 (-0.137, -0.006) * | -0.433 (-1.936, 1.069) |
| ***Infection indicators*** | | | | | | |
| SAA | 4.734 (-11.795, 21.263) | 12.104 (-1.87, 26.078) | -24.655 (-30.863, -18.446) *** | -2.323 (-13.761, 9.114) | 0.165 (-0.186, 0.517) | -4.055 (-11.788, 3.679) |
| CRP | 1.232 (-1.048, 3.512) | 2.591 (0.325, 4.857) * | -2.356 (-3.513, -1.198) *** | -1.911 (-3.493, -0.329) * | 0.049 (-0.007, 0.104) | 0.475 (-0.822, 1.773) |
| ***Liver function index*** | | | | | | |
| AST | -3.760 (-6.598, -0.923) ** | -4.872 (-7.123, -2.621) *** | -2.255 (-3.324, -1.186) *** | -1.843 (-3.589, -0.097) * | -0.045 (-0.100, 0.011) | 1.266 (-0.078, 2.610) |
| ALT | -3.012 (-6.933, 0.910) | -0.006 (-3.183, 3.171) | -3.106 (-4.804, -1.407) *** | -6.361 (-8.892, -3.831) *** | -0.070 (-0.138, -0.001) * | 3.341 (1.043, 5.638) ** |
| DBIL | -0.072 (-0.457, 0.313) | 0.153 (-0.155, 0.462) | -0.112 (-0.202, -0.022) * | -1.039 (-1.273, -0.804) *** | 0.0004 (-0.007, 0.008) | 0.131 (-0.040, 0.301) |
| ALB | -0.075 (-0.945, 0.796) | 0.627 (-0.076, 1.331) | -0.523 (-0.632, -0.415) *** | -0.836 (-1.295, -0.378) *** | -0.076 (-0.091, -0.062) *** | 0.001 (-0.346, 0.349) |
| ***Myocardial enzymes*** | | | | | | |
| CKMB | 0.622 (-1.733, 2.976) | 0.624 (-1.036, 2.284) | -0.567 (-0.971, -0.163) ** | -0.608 (-1.835, 0.618) | -0.081 (-0.127, -0.035) *** | 0.957 (0.015, 1.900) * |
| CK | -21.437 (-41.316, -1.558) * | -26.222 (-44.929, -7.516) ** | -18.924 (-34.814, -3.035) * | -40.437 (-51.644, -29.23) *** | 0.253 (-0.137, 0.643) | -8.026 (-15.624, -0.428) * |
| ***Renal function index*** | | | | | | |
| BUN | -0.089 (-0.377, 0.200) | -0.354 (-0.613, -0.095) ** | -0.001 (-0.042, 0.040) | -0.660 (-0.830, -0.490) *** | 0.021 (0.015, 0.027) *** | 0.320 (0.175, 0.465) *** |
| Cr | 0.273 (-3.621, 4.167) | 2.690 (-0.685, 6.066) | -0.267 (-0.747, 0.212) | -17.914 (-19.833, -15.994) *** | 0.207 (0.136, 0.279) *** | 0.926 (-0.534, 2.387) |
| ***Biochemical indicators*** | | | | | | |
| K+ | 0.029 (-0.053, 0.110) | -0.046 (-0.108, 0.017) | 0.103 (0.093, 0.114) *** | -0.095 (-0.141, -0.049) *** | 0.001 (-0.0004, 0.002) | 0.014 (-0.018, 0.047) |
| Glu | 0.135 (-0.284, 0.554) | 0.292 (-0.115, 0.698) | -0.222 (-0.273, -0.172) *** | -0.062 (-0.347, 0.223) | 0.015 (0.008, 0.022) *** | 0.876 (0.611, 1.141) *** |
| ***Coagulation function index*** | | | | | | |
| DD | -1.048 (-2.550, 0.454) | -0.588 (-2.022, 0.847) | 0.250 (-0.206, 0.705) *** | -0.309 (-0.883, 0.264) | -0.006 (-0.033, 0.020) *** | 0.399 (-0.474, 1.272) *** |
| APTT | -0.415 (-1.216, 0.385) | -0.857 (-1.530, -0.184) * | -0.083 (-0.203, 0.037) | -0.968 (-1.407, -0.53) *** | -0.036 (-0.052, -0.021) *** | 0.105 (-0.212, 0.423) |
| PT | 0.072 (-0.206, 0.350) | -0.310 (-0.545, -0.076) ** | -0.160 (-0.238, -0.082) *** | -0.208 (-0.349, -0.068) ** | -0.013 (-0.018, -0.008) *** | -0.050 (-0.149, 0.048) |
| TT | -0.256 (-0.844, 0.331) | -0.955 (-1.715, -0.195) * | -0.007 (-0.138, 0.125) | 0.092 (-0.238, 0.422) | 0.002 (-0.008, 0.012) | 0.185 (-0.295, 0.666) |

RBC, red blood cell count; WBC, white blood cell count; LYM, lymphocyte count; NEU, neutrophil count; PLT, platelet count; HGB, haemoglobin; SAA, serum amyloid A protein; CRP, C-reactive protein; AST, aspartic transaminase; ALT, alanine aminotransferase; DBIL, direct bilirubin; ALB, albumin; CKMB, creatinine kinase-myocardial band; CK, creatine kinase; BUN, blood urea nitrogen; Cr, creatinine; K+, potassium; Glu, glucose; DD, D-Dimer; APTT, activated partial thromboplastin time; PT, prothrombin time; TT, thrombin time.

All variables in models: vaccine dose (0~1 dose, 2 doses and 3~ doses), days from admission, number of comorbidities, gender and age. *****, *P*<0.05; ******, *P*<0.01; *******, *P*<0.001.

**Table S4. Results of multivariate generalized estimating equation analysis of vaccine dose and laboratory indicators in Omicron patients** **after excluded unvaccinated patients before admission and further adjusting interval of last vaccination-to-admission.**

| **Dependent variables** | ***β* (95%CI)** | | | | | | |
| --- | --- | --- | --- | --- | --- | --- | --- |
| **2 doses (1 dose as reference)** | **3~ doses (1 dose as reference)** | **Days from admission** | **Female**  **(male as reference)** | **Age** | **Number of comorbidities** | **Interval of last vaccination-to-admission** |
| ***Blood routine index*** | | | | | | | |
| RBC | 0.055 (-0.120, 0.229) | 0.161 (-0.013, 0.334) | 0.023 (0.008, 0.038) ** | -0.530 (-0.589, -0.472) *** | -0.006 (-0.008, -0.004) *** | 0.028 (-0.016, 0.073) | 0.0002 (-0.0002, 0.001) |
| WBC | 0.409 (-0.267, 1.080) | 0.514 (-0.126, 1.160) | 0.048 (0.002, 0.094) * | -0.534 (-0.791, -0.276) *** | -0.008 (-0.017, 0.0001) | 0.117 (-0.076, 0.309) | -0.001 (-0.003, 0.001) |
| LYM | 0.142 (-0.123, 0.407) | 0.059 (-0.194, 0.312) | 0.160 (0.145, 0.175) *** | -0.090 (-0.170, -0.011) * | -0.005 (-0.008, -0.003) *** | 0.050 (-0.018, 0.117) | -0.001 (-0.002, -0.001) *** |
| NEU | 0.254 (-0.320, 0.829) | 0.427 (-0.116, 0.971) | -0.106 (-0.148, -0.064) *** | -0.305 (-0.533, -0.076) ** | -0.002 (-0.009, 0.006) | 0.044 (-0.119, 0.206) | 0.0002 (-0.001, 0.002) |
| PLT | -8.033 (-26.868, 10.803) | 2.472 (-15.101, 20.046) | 5.467 (3.938, 6.996) *** | 18.354 (10.413, 26.295) *** | -0.833 (-1.089, -0.577) *** | -0.161 (-5.451, 5.129) | 0.007 (-0.042, 0.056) |
| HGB | -0.300 (-5.687, 5.088) | 2.673 (-2.563, 7.910) | 0.361 (-0.104, 0.825) | -19.832 (-21.690, -17.975) *** | -0.043 (-0.107, 0.022) | 0.084 (-1.261, 1.430) | 0.007 (-0.005, 0.019) |
| ***Infection indicators*** | | | | | | | |
| SAA | -19.399 (-51.908, 13.110) | -10.751 (-41.544, 20.042) | -22.953 (-27.313, -18.593) *** | -1.059 (-12.960, 10.841) | 0.082 (-0.300, 0.463) | -5.945 (-14.228, 2.338) | -0.020 (-0.092, 0.052) |
| CRP | -0.390 (-4.202, 3.422) | 1.038 (-2.639, 4.715) | -2.407 (-3.040, -1.773) *** | -1.965 (-3.458, -0.472) ** | 0.034 (-0.015, 0.082) | 0.411 (-0.686, 1.509) | -0.002 (-0.012, 0.008) |
| ***Liver function index*** | | | | | | | |
| AST | 0.190 (-3.475, 3.855) | -2.259 (-5.810, 1.292) | -4.101 (-6.246, -1.956) *** | -2.755 (-4.408, -1.102) ** | 0.012 (-0.035, 0.059) | 1.122 (-0.346, 2.589) | -0.003 (-0.011, 0.006) |
| ALT | -4.422 (-11.555, 2.711) | -1.101 (-7.799, 5.598) | -6.339 (-10.382, -2.297) ** | -7.629 (-10.206, -5.052) *** | -0.045 (-0.120, 0.030) | 3.334 (0.792, 5.876) * | 0.015 (-0.002, 0.033) |
| DBIL | 0.260 (-0.334, 0.854) | 0.631 (0.075, 1.187) * | -0.100 (-0.244, 0.043) | -1.049 (-1.290, -0.809) *** | -0.003 (-0.011, 0.004) | 0.084 (-0.092, 0.259) | 0.001 (-0.0002, 0.003) |
| ALB | -2.074 (-3.226, -0.923) *** | -1.270 (-2.306, -0.235) * | -0.520 (-0.619, -0.420) *** | -1.309 (-1.749, -0.868) *** | -0.076 (-0.090, -0.061) *** | -0.077 (-0.409, 0.255) | 0.002 (-0.001, 0.005) |
| ***Myocardial enzymes*** | | | | | | | |
| CKMB | 3.710 (1.125, 6.294) ** | 2.177 (0.077, 4.277) * | -0.535 (-0.940, -0.130) ** | -0.889 (-2.108, 0.329) | -0.016 (-0.060, 0.028) | 0.521 (-0.372, 1.414) | -0.007 (-0.016, 0.002) |
| CK | 10.343 (-14.054, 34.741) | 6.314 (-16.416, 29.044) | -20.666 (-39.718, -1.614) * | -34.593 (-45.285, -23.900) *** | 0.124 (-0.280, 0.529) | -4.428 (-10.339, 1.483) | 0.014 (-0.042, 0.069) |
| ***Renal function index*** | | | | | | | |
| BUN | -0.031 (-0.715, 0.653) | -0.452 (-1.132, 0.229) | 0.014 (-0.027, 0.056) | -0.727 (-0.899, -0.555) *** | 0.023 (0.017, 0.029) *** | 0.346 (0.193, 0.500) *** | -0.002 (-0.003, -0.001) ** |
| Cr | -9.560 (-18.043, -1.078) * | -5.853 (-14.179, 2.473) | -0.160 (-0.561, 0.242) | -18.344 (-20.116, -16.571) *** | 0.183 (0.117, 0.249) *** | 1.311 (-0.209, 2.832) | 0.018 (0.006, 0.031) ** |
| ***Biochemical indicators*** | | | | | | | |
| K+ | -0.018 (-0.169, 0.132) | -0.105 (-0.247, 0.037) | 0.100 (0.089, 0.112) *** | -0.082 (-0.129, -0.034) *** | 0.001 (-0.001, 0.003) | 0.007 (-0.028, 0.042) | -0.0003 (-0.001, 0.0001) |
| Glu | 0.534 (-0.189, 1.256) | 0.582 (-0.092, 1.256) | -0.212 (-0.265, -0.159) *** | -0.147 (-0.443, 0.150) | 0.015 (0.007, 0.023) *** | 0.995 (0.712, 1.278) *** | -0.001 (-0.003, 0.001) |
| ***Coagulation function index*** | | | | | | | |
| DD | -0.185 (-1.505, 1.135) | 0.072 (-1.549, 1.692) | 0.274 (-0.228, 0.775) | -0.179 (-0.759, 0.402) | 0.014 (-0.007, 0.034) | 0.558 (-0.688, 1.804) | 0.001 (-0.001, 0.003) |
| APTT | -0.852 (-2.148, 0.444) | -1.458 (-2.620, -0.295) * | -0.104 (-0.206, -0.002) * | -0.966 (-1.425, -0.507) *** | -0.040 (-0.057, -0.023) *** | 0.065 (-0.266, 0.396) | -0.001 (-0.003, 0.002) |
| PT | 0.147 (-0.176, 0.469) | -0.155 (-0.448, 0.139) | -0.217 (-0.294, -0.139) *** | -0.086 (-0.218, 0.046) | -0.016 (-0.020, -0.011) *** | -0.079 (-0.169, 0.012) | 0.0001 (-0.001, 0.001) |
| TT | 0.199 (-0.185, 0.583) | -0.477 (-0.830, -0.124) ** | 0.070 (0.024, 0.115) ** | 0.295 (0.140, 0.449) *** | -0.003 (-0.008, 0.003) | -0.073 (-0.194, 0.048) | -0.001 (-0.002, 0.0002) |

RBC, red blood cell count; WBC, white blood cell count; LYM, lymphocyte count; NEU, neutrophil count; PLT, platelet count; HGB, haemoglobin; SAA, serum amyloid A protein; CRP, C-reactive protein; AST, aspartic transaminase; ALT, alanine aminotransferase; DBIL, direct bilirubin; ALB, albumin; CKMB, creatinine kinase-myocardial band; CK, creatine kinase; BUN, blood urea nitrogen; Cr, creatinine; K+, potassium; Glu, glucose; DD, D-Dimer; APTT, activated partial thromboplastin time; PT, prothrombin time; TT, thrombin time.

All variables in models: vaccine dose (0~1 dose, 2 doses and 3~ doses), days from admission, number of comorbidities, gender and age. *****, *P*<0.05; ******, *P*<0.01; *******, *P*<0.001.

**Supplementary Figure 1**


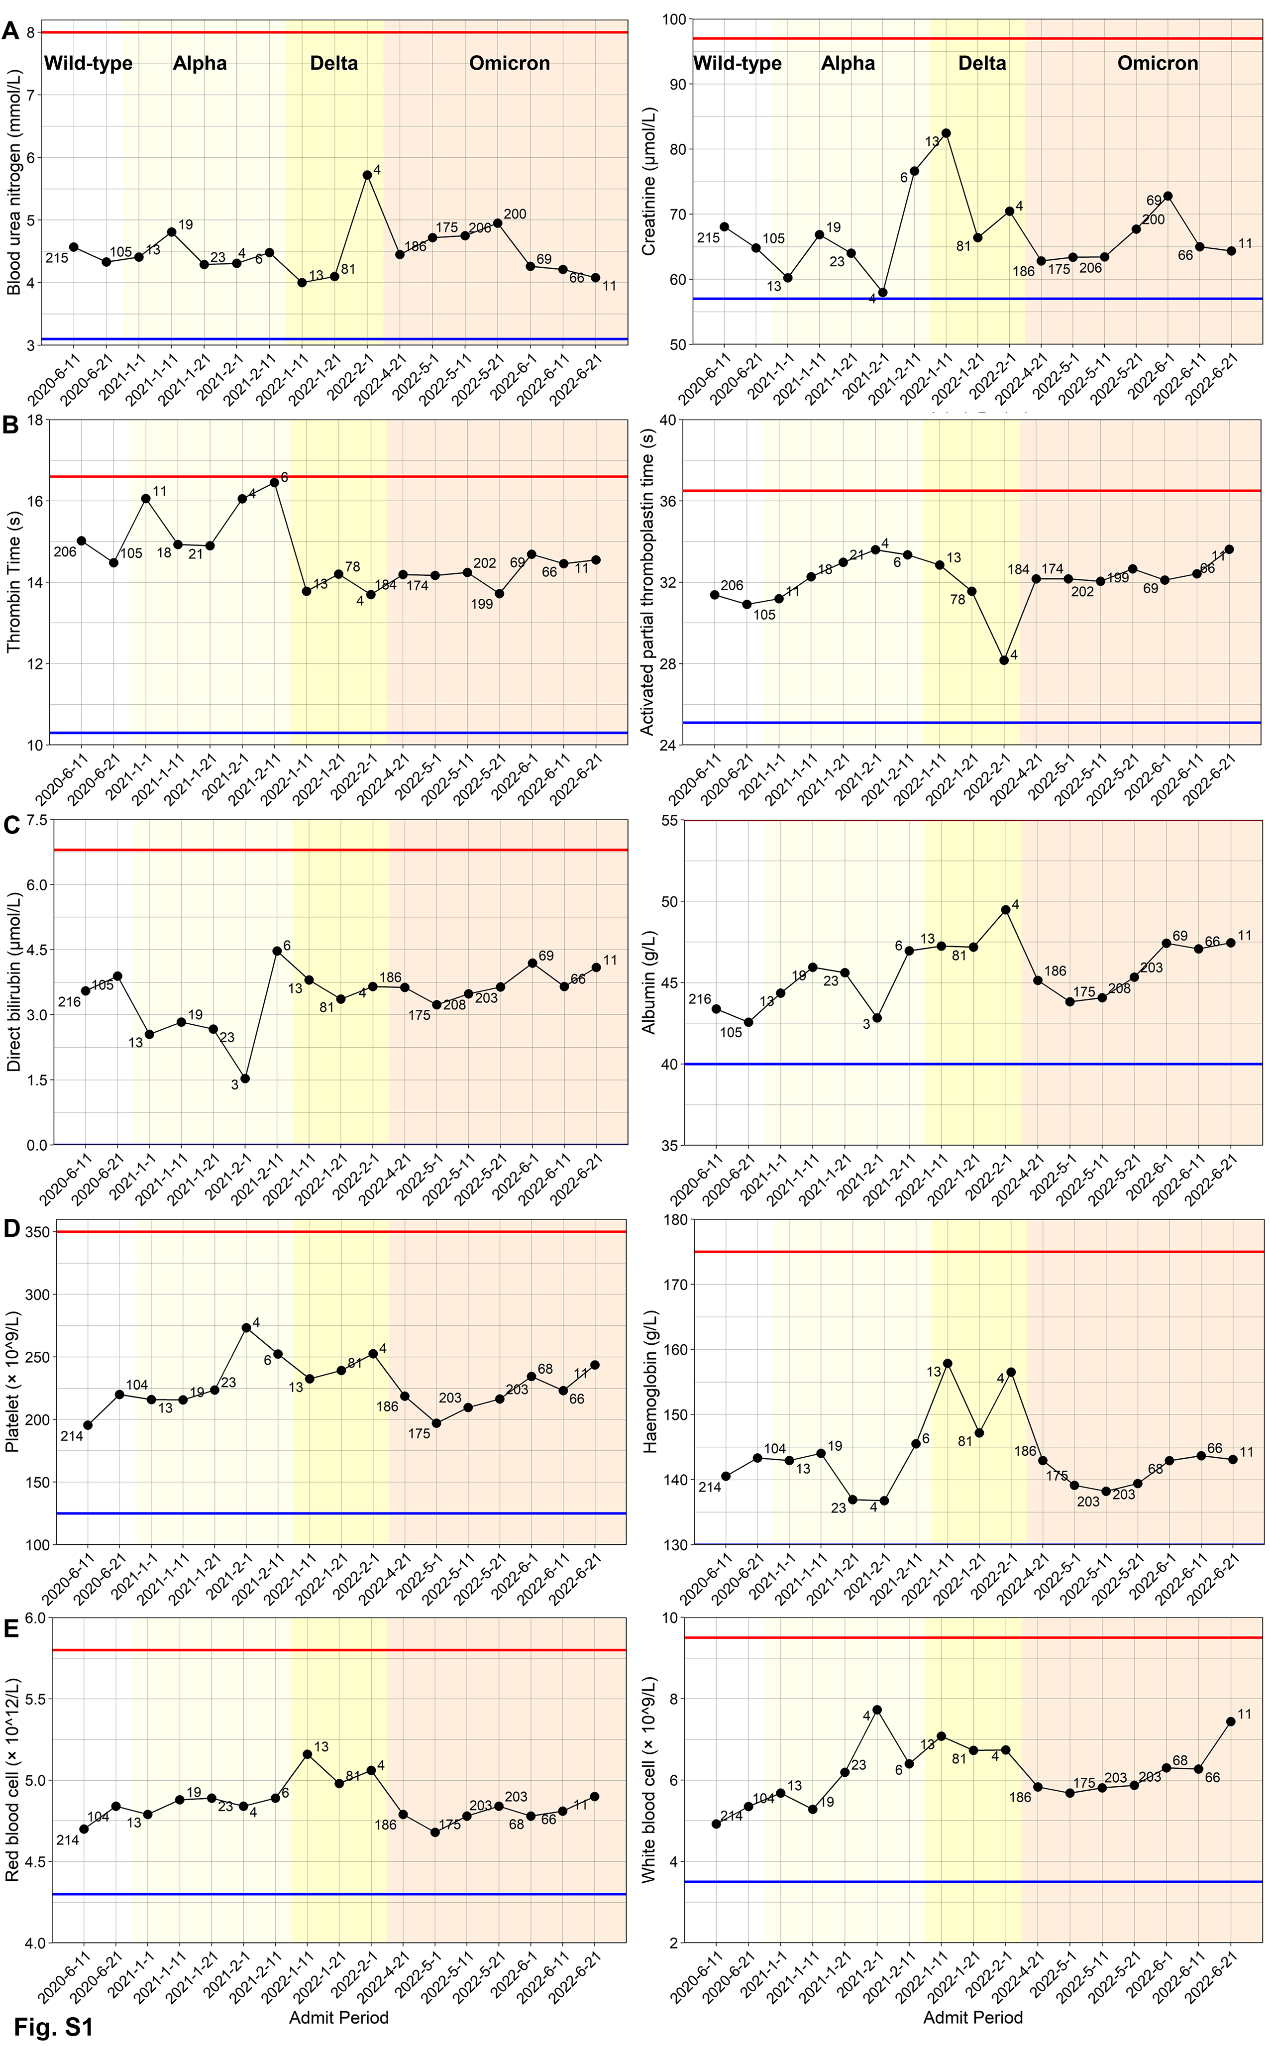


**Supplementary Figure 2**


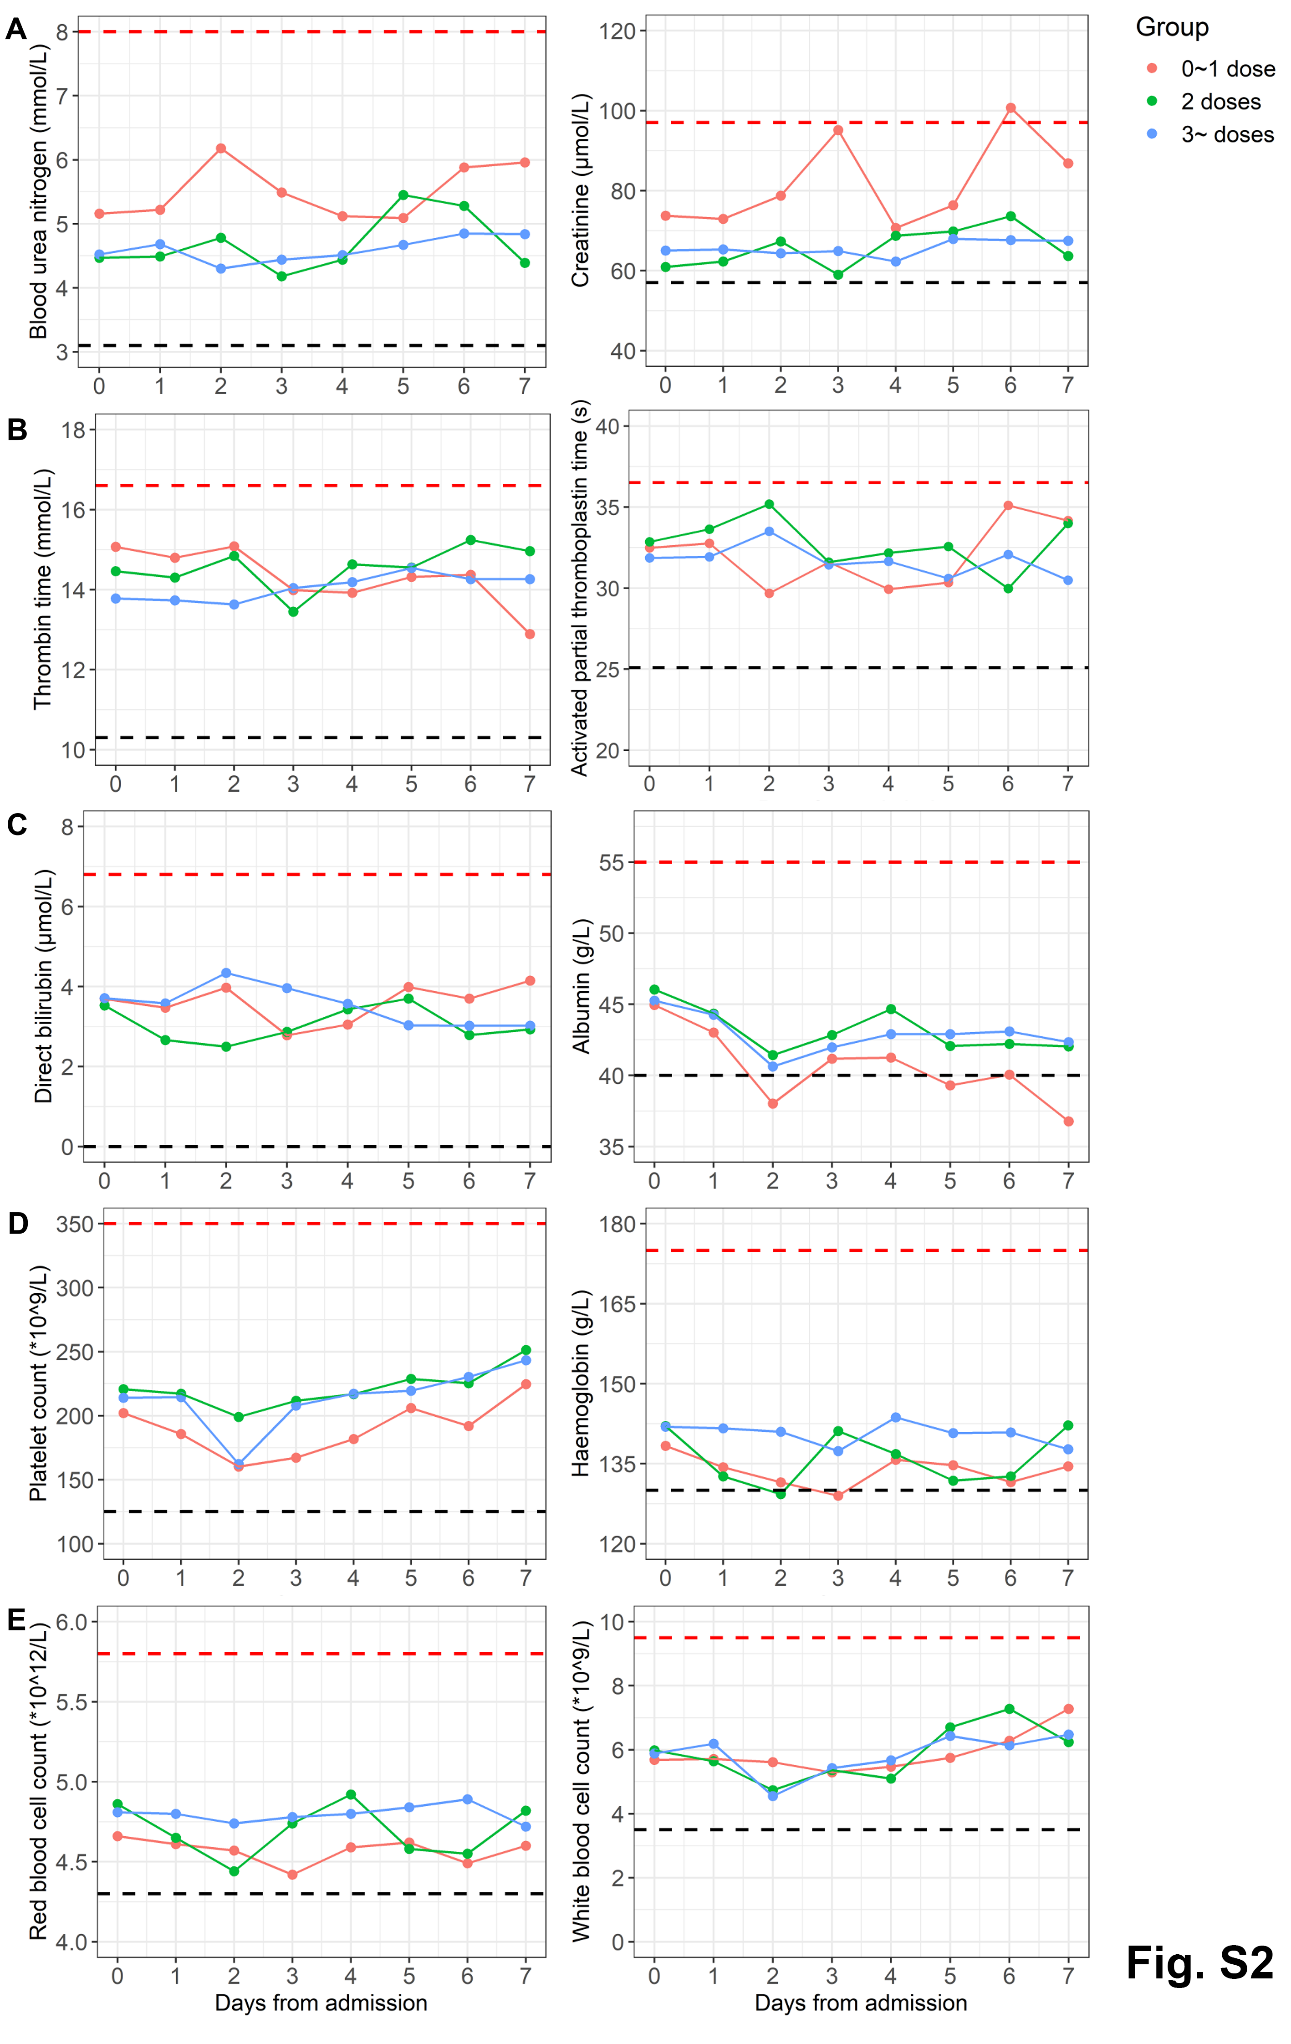


**Supplementary Figure Legends**

**Figure S1. Patient laboratory assay values at admission in four variant groups from June 2020 to June 2022.** (A) Blood urea nitrogen and Creatinine; (B) Thrombin time and Activated partial thromboplastin time; (C) Direct bilirubin and Albumin; (D) Platelet and Haemoglobin; (E) Red blood cell and White blood cell. The red solid line and blue solid line represent the upper and lower limits of the normal range, respectively.

**Figure S2.** **Laboratory assay values during hospitalization in patients with Omicron infection grouped by vaccinations.** (A) Blood urea nitrogen and Creatinine; (B) Thrombin time and Activated partial thromboplastin time; (C) Direct bilirubin and Albumin; (D) Platelet and Haemoglobin; (E) Red blood cell and White blood cell. The red dashed line and black line represent the upper and lower limits of the normal range, respectively.
